# Supplementary material for: Ultra-long VO2 (A) nanorods using the high-temperature mixing method under hydrothermal conditions: synthesis, evolution and thermochromic properties
Source: Royal Society of Chemistry journal article supplement (doi:10.1039/c3ce27085h), 2013-01-01
Supplement: c3ce27085h.pdf [file c3ce27085h.pdf]

# Ultra-long VO<sub>2</sub> (A) Nanorods using the High-Temperature Mixing Method under Hydrothermal Conditions: Synthesis, Evolution and Thermochromic Properties

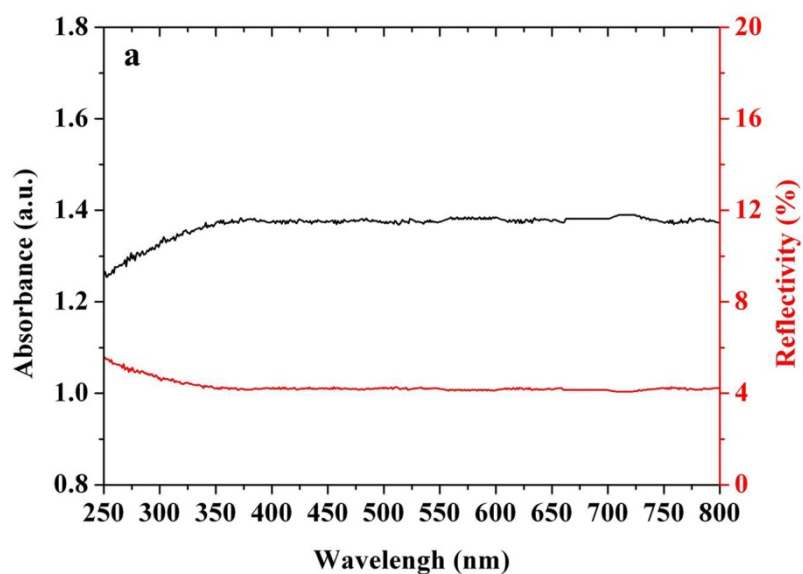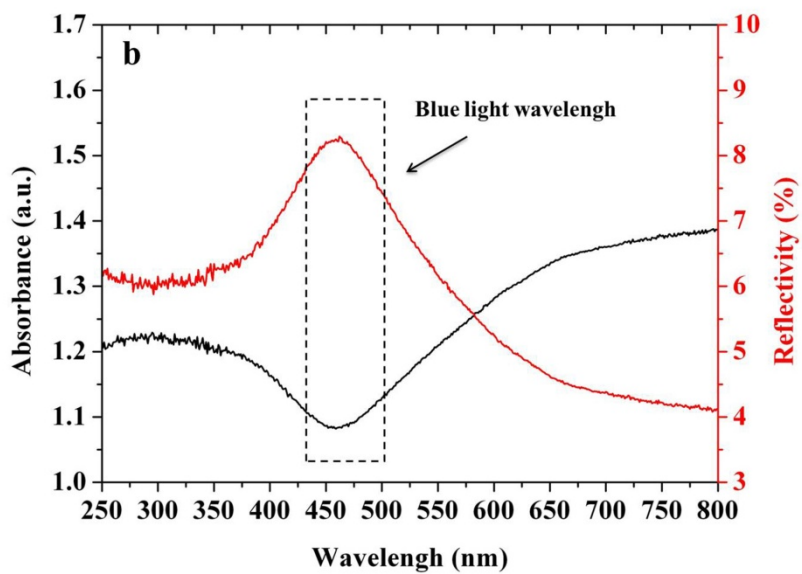

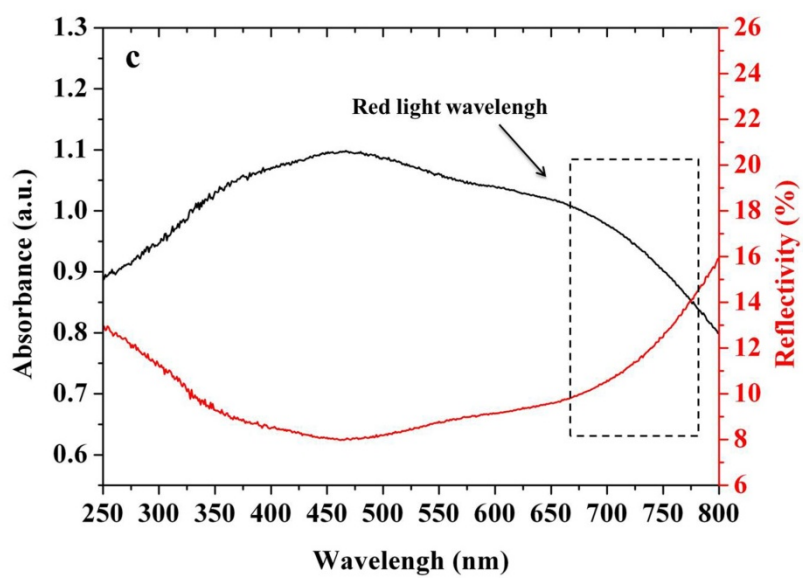

**Fig.S1.** Reflectance and absorption optical spectra of VO<sub>2</sub> powders: (a) VO<sub>2</sub> (M); (b) VO<sub>2</sub> (B); (c) VO<sub>2</sub> (A)
